# Supplementary material for: Acid Solution Processed VO2-Based Composite Films with Enhanced Thermochromic Properties for Smart Windows
Source: MDPI journal article supplement (doi:10.3390/ma14174927), 2021-08-30
Supplement: s1 [file s1]

## Supporting Information

### Acid Solution Processed VO<sub>2</sub>-Based Composite Films with Enhanced Thermochromic Properties for Smart Windows

Zhe Wang <sup>1,2</sup>, Bin Li <sup>1</sup>, Shouqin Tian <sup>1,\*</sup>, Baoshun Liu <sup>1</sup>, Xiujian Zhao <sup>1</sup>, Xuedong Zhou <sup>1</sup>, Gen Tang <sup>2</sup> and Aimin Pang <sup>2,\*</sup>

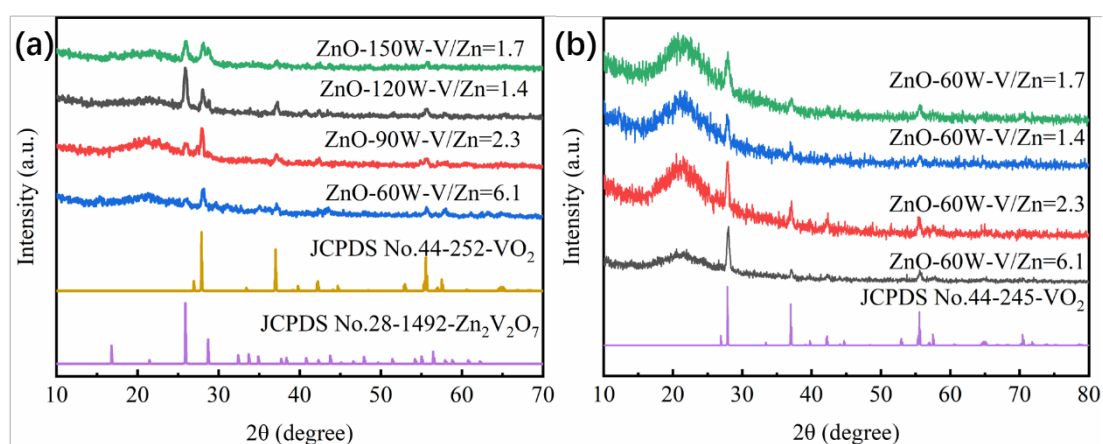

**Figure S1.** XRD patterns of Zn<sub>2</sub>V<sub>2</sub>O<sub>7</sub>-VO<sub>2</sub> composite films ((a) before acid solution processing) and porous VO<sub>2</sub> films ((b) after acid solution process) with different sputtering powers of ZnO target.
